# Supplementary material for: The Association of Social Support and Loneliness with Symptoms of Depression, Anxiety, and Posttraumatic Stress during the COVID-19 Pandemic: A Meta-Analysis
Source: Int J Environ Res Public Health. 2023 Feb 4;20(4):2765. doi: 10.3390/ijerph20042765 (PMC9957328; doi:10.3390/ijerph20042765)
Supplement: Supplementary file 1 [file ijerph-20-02765-s001.zip › ijerph-2189661-supplementary.pdf]

## Supplementary Material File S1

**Table S1.** Overview of the search terms used in each database.

| Pubmed                                  |                   | ScienceDirect <sup>a</sup> |                   | Web of Science <sup>b</sup> |                   |
|-----------------------------------------|-------------------|----------------------------|-------------------|-----------------------------|-------------------|
| Search terms                            | Boolean operators | Search terms               | Boolean operators | Search terms                | Boolean operators |
| Social support [Mesh]                   | OR                | Social support [kwd]       | OR                | Social support [kwd]        | OR                |
| Social networks [kwd]                   | OR                | Social networks [kwd]      | OR                | Social networks [kwd]       | OR                |
| Social connectedness [kwd]              | OR                | Social relationships [kwd] | OR                | Social connectedness [kwd]  | OR                |
| Social relationships [kwd]              | OR                | Social isolation [kwd]     | OR                | Social relationships [kwd]  | OR                |
| Social isolation [Mesh]                 | OR                | Loneliness [kwd]           | AND               | Social isolation [kwd]      | OR                |
| Loneliness [Mesh]                       | AND               | Mental health [kwd]        | OR                | Loneliness [kwd]            | AND               |
| Mental health [Mesh]                    | OR                | Mental disorders [kwd]     | AND               | Mental health [kwd]         | OR                |
| Mental disorders [Mesh]                 | OR                | COVID-19 [kwd]             | OR                | Mental disorders [kwd]      | OR                |
| Anxiety disorders [Mesh]                | OR                | Lockdown [kwd]             | AND               | Anxiety disorders [kwd]     | OR                |
| Depressive disorders [Mesh]             | OR                |                            |                   | Depressive disorders [kwd]  | OR                |
| Depression [Mesh]                       | OR                |                            |                   | Depression [kwd]            | OR                |
| Anxiety [Mesh]                          | OR                |                            |                   | Anxiety [kwd]               | OR                |
| Stress disorders, post-traumatic [Mesh] | OR                |                            |                   | Post-traumatic [kwd]        | OR                |
| stress disorder [kwd]                   | AND               |                            |                   | stress disorder [kwd]       | AND               |
| COVID-19 [Mesh]                         | OR                |                            |                   | COVID-19 [kwd]              | OR                |
| Lockdown [kwd]                          | OR                |                            |                   | Lockdown [kwd]              | OR                |
| Quarantine [kwd]                        | OR                |                            |                   | Quarantine [kwd]            | OR                |
| Pandemic [kwd]                          | AND               |                            |                   | Pandemic [kwd]              | AND               |
| "2020/01/01" [Date - Publication] :     |                   | Year "2020-2022"           |                   | DOP=(2020-01-01/2022-10-03) |                   |
| "2022/10/03" [Date - Publication]       |                   |                            |                   |                             |                   |
| <b>Hits:</b>                            | <b>835</b>        | <b>Hits:</b>               | <b>532</b>        | <b>Hits:</b>                | <b>2792</b>       |

**Note:** <sup>a</sup>ScienceDirect search was filtered by 'Article type' selecting 'Research articles'; <sup>b</sup>Web of science search keywords used the advanced search field tag AB, which searches the Abstract field within a record, and the search was filtered by 'Type of document' selecting 'Article'.

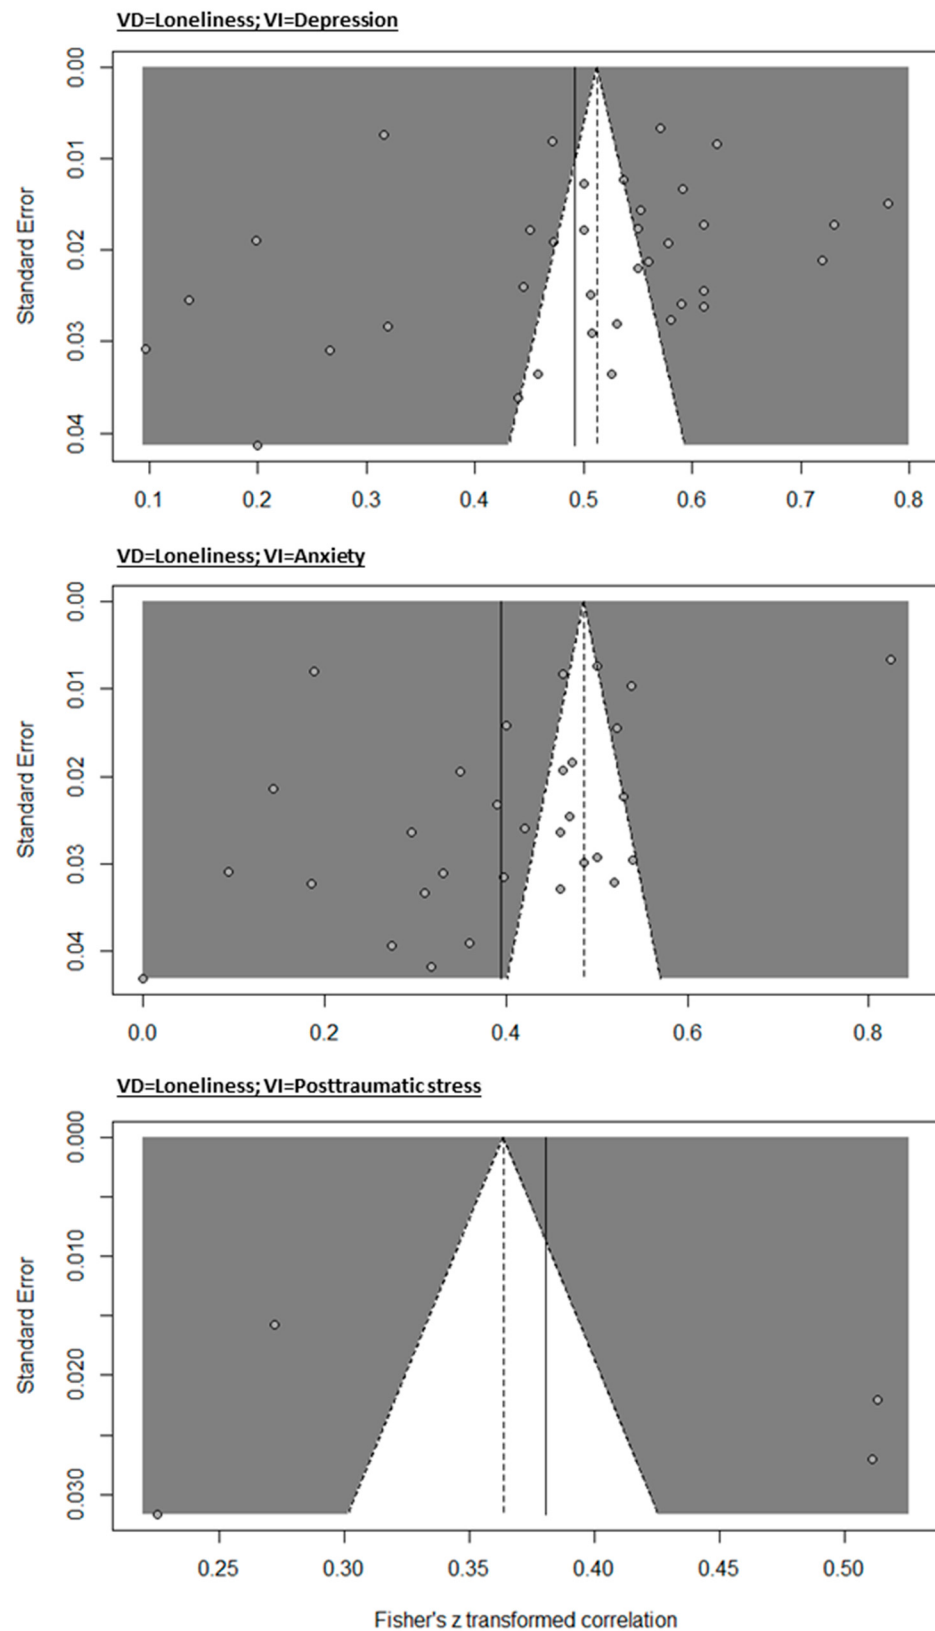

**Figure S1.** Funnel plots representing the standard error by Fisher's Z for the loneliness' effect sizes showing the symmetry of the data in relation to publication bias.

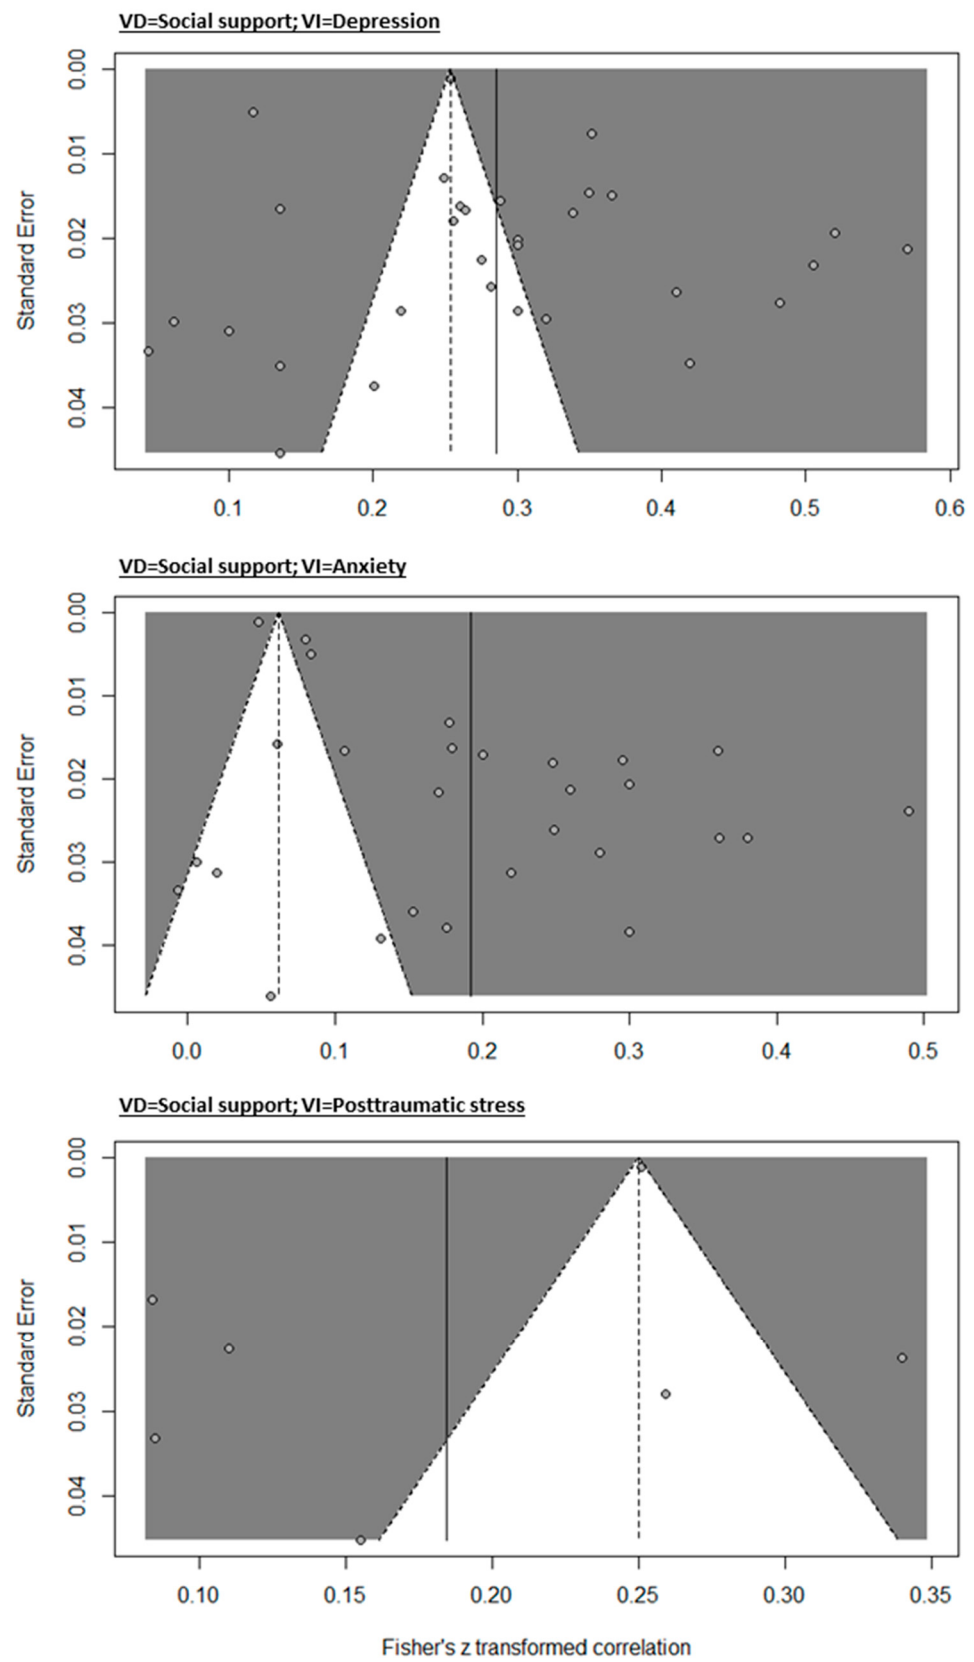

**Figure S2.** Funnel plots representing the standard error by Fisher's Z for the social support effect sizes showing the symmetry of the data in relation to publication bias.

## Supplementary Material File S2

Adapted version of the Newcastle Ottawa Scale (NOS).

### Newcastle-Ottawa Scale adapted for cross-sectional studies

**Selection** (maximum 5 stars):

1. Representativeness of the sample (max. 1 \*):
  - a. Truly representative of the average in the target population. \* (all subjects or random sampling)
  - b. Somewhat representative of the average in the target group. \* (non-random sampling)
  - c. Selected group of users/convenience sample.
  - d. No description of the sampling strategy.
2. Sample size (max. 1 \*):
  - a. Justified and satisfactory (including sample size calculation). \*
  - b. Not justified or no information provided.
3. Non-respondents (max. 1 \*):
  - a. Score if one of the following items were fulfilled: \*
    - ✓ Comparability between respondents and non-respondents' characteristics is established, and the response rate is satisfactory.
    - ✓ Response rate=100%.
    - ✓ The study employed multiple imputation approach to account for the uncertainty in missing responses.
  - b. The response rate is unsatisfactory, or the comparability between respondents and non-respondents is unsatisfactory.
  - c. No description of the response rate or the characteristics of the responders and the non-responders.
4. Ascertainment of the exposure [social support or/and loneliness] (max. 2 \*):
  - a. Validated measurement tool for the study setting and language. \*\*
  - b. Measurement tool not validated for the specific study setting and language, but the tool is validated in other populations. \*
  - c. Non-validated measurement tool or no description of the measurement tool.

**Comparability** (maximum 2 stars):

1. Comparability of subjects in different outcome groups on the basis of design or analysis. Confounding factors controlled.
  - a. The study controls for age and sex \*
  - b. The study controls for other relevant factors (economic, education, marital status, pre-pandemic mental disorders) \*
  - c. Data/results not adjusted for all relevant confounders/risk factors/information not provided.

**Outcome** (maximum 3 stars):

1. Assessment of outcome [depression, anxiety, or PTSD symptoms] (max. 2 \*):
  - a. Validated measurement tool for the study setting and language. \*\*

- b. Measurement tool not validated for the specific study setting and language, but the tool is validated in other populations. \*
  - c. Non-validated measurement tool or no description of the measurement tool.
2. Statistical test (max. 1 \*):
- a. The statistical test used to analyse the data is clearly described and appropriate, and the measurement of the association is presented, including confidence intervals and the probability level (p-value). \*
  - b. Statistical test not appropriate, not described or incomplete.

#### Newcastle-Ottawa Scale adapted for longitudinal studies

#### Selection (maximum 5 stars):

1. Representativeness of the sample (max. 1 \*):
  - a. Truly representative of the average in the target population. \* (all subjects or random sampling)
  - b. Somewhat representative of the average in the target group. \* (non-random sampling)
  - c. Selected group of users/convenience sample.
  - d. No description of the sampling strategy.
2. Sample size (max. 1 \*):
  - a. Justified and satisfactory (including sample size calculation). \*
  - b. Not justified or no information provided
3. Non-respondents (max. 1 \*):
  - a. Score if one of the following items were fulfilled: \*
    - ✓ Comparability between respondents and non-respondents' at follow-up is established, and the response rate is satisfactory.
    - ✓ Response rate=100%.
    - ✓ The study employed multiple imputation approach to account for the uncertainty in missing responses.
  - b. The response rate at baseline is unsatisfactory, or the comparability between respondents and non-respondents is unsatisfactory or the variables assessment is different between waves.
  - c. No description of the response rate or the characteristics of the responders and the non-responders.
4. Ascertainment of the exposure [social support or/and loneliness] (max. 2 \*):
  - a. Validated measurement tool for the study setting and language. \*\*
  - b. Measurement tool not validated for the specific study setting and language, but the tool is validated in other populations. \*
  - c. Non-validated measurement tool or no description of the measurement tool.

#### Comparability (maximum 2 stars):

1. Comparability of subjects in different outcome groups on the basis of design or analysis. Confounding factors controlled.
  - a. The study controls for age and sex \*
  - b. The study controls for other relevant factors (economic, education, marital status, pre-pandemic mental disorders) \*
  - c. Data/results not adjusted for all relevant confounders/risk factors/information not provided.

#### Outcome (maximum 3 stars):

1. Assessment of outcome [depression, anxiety, or PTSD symptoms] (max. 2 \*):
  - a. Validated measurement tool for the study setting and language. \*\*
  - b. Measurement tool not validated for the specific study setting and language, but the tool is validated in other populations. \*
  - c. Non-validated measurement tool or no description of the measurement tool.
2. Statistical test (max. 1 \*):
  - a. Complete follow-up, all subjects accounted for. \*
  - b. Subjects lost to follow-up unlikely to introduce bias: number lost less than or equal to 20% or description of those lost suggested no different from those followed. \*
  - c. Follow-up rate less than 80% and no description of those lost.
  - d. No statement.

**Thresholds** for converting the Newcastle-Ottawa scales to AHRQ standards (good, fair, and poor):

- **Good quality:** 3 or more stars in selection domain AND 1 or 2 stars in comparability domain AND 2 or 3 stars in outcome/exposure domain
- **Fair quality:** 2 stars in selection domain AND 1 or 2 stars in comparability domain AND 2 or 3 stars in outcome/exposure domain
- **Poor quality:** 0 or 1 star in selection domain OR 0 stars in comparability domain OR 0 or 1 stars in outcome/exposure domain
